# Supplementary material for: Fractal modes and multi-beam generation from hybrid microlaser resonators
Source: PubMed Central journal article supplement (PMC6030083; doi:10.1038/s41467-018-04945-8), 2018-07-03
Supplement: 41467_2018_4945_MOESM1_ESM.pdf [file 41467_2018_4945_MOESM1_ESM.pdf]

## Supplementary Information

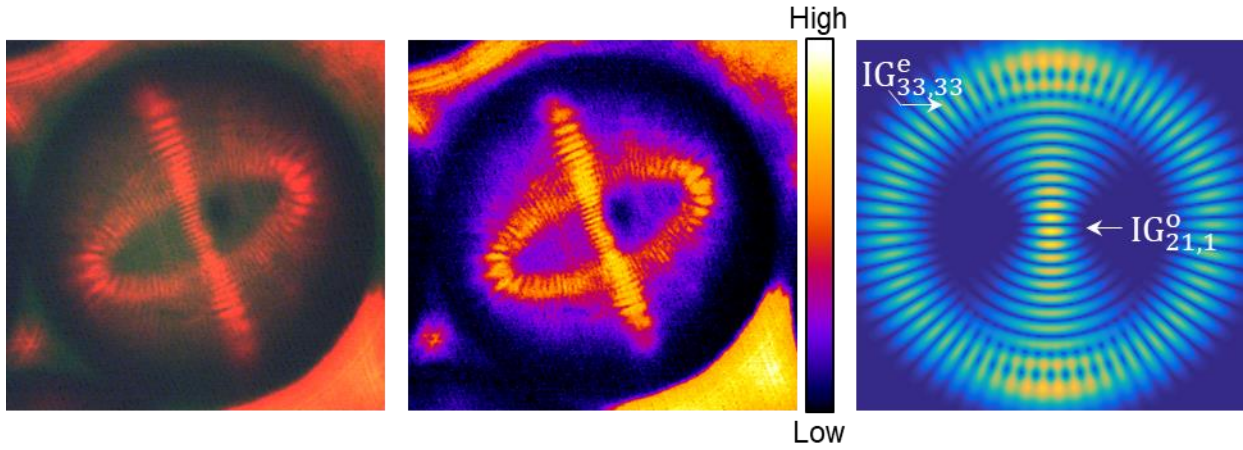

**Supplementary Figure 1: Superposition of the  $IG_{33,33}^e$  and  $IG_{21,1}^o$  modes.** These modes were observed in experiments with  $d=200$   $\mu\text{m}$  spheres (left, and false color at center). The panel at right is a simulation of the two modes, illustrated as a projection onto a plane.

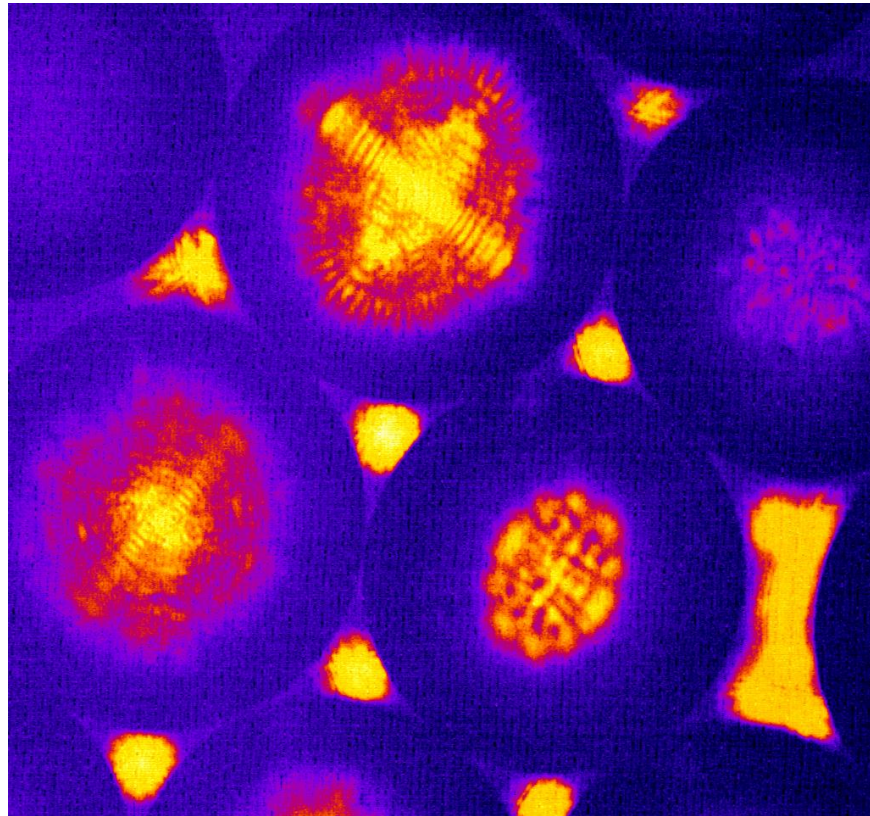

**Supplementary Figure 2: IG and fractal laser modes emitted from a portion of an array of microspheres.**

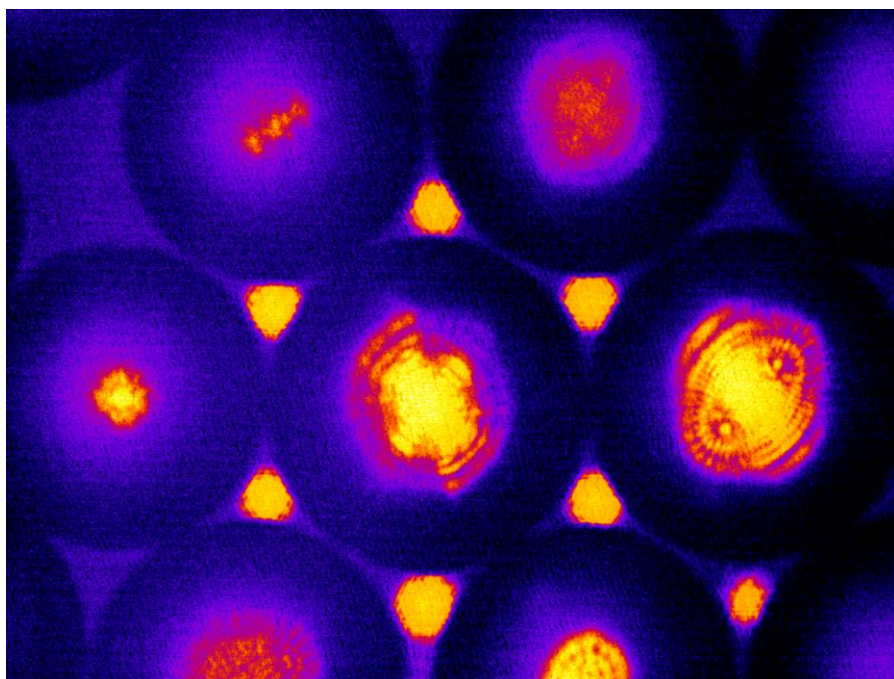

**Supplementary Figure 3: Optical micrograph (false color) of both IG and fractal laser modes.** The latter are generated within interstitial regions.

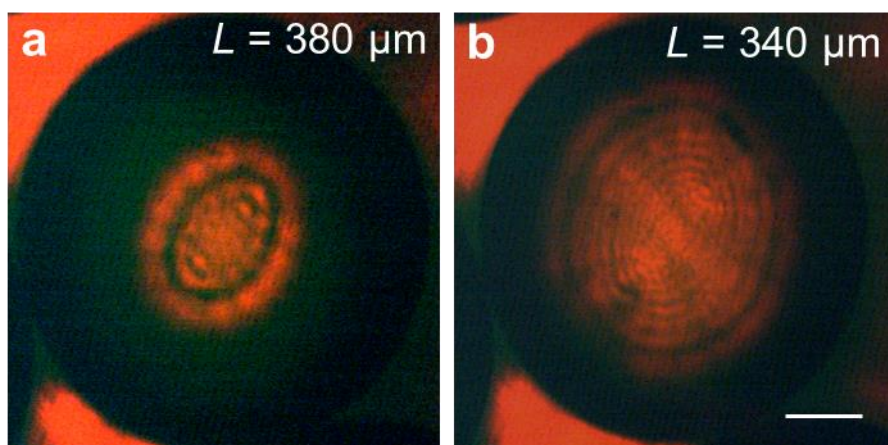

**Supplementary Figure 4: Increase in IG mode order as L is decreased.** **a**, IG transverse mode observed from a single sphere when L is set at 380  $\mu\text{m}$ . **b**, Mode pattern observed from the same sphere when L is reduced to 340  $\mu\text{m}$ . The scale bar width is 40  $\mu\text{m}$ .

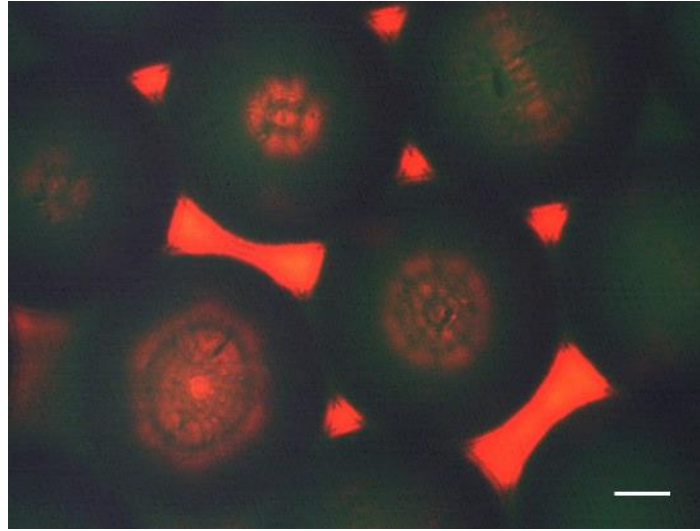

**Supplementary Figure 5:** Another optical micrograph of a portion of a microsphere array, showing low-order fractal modes similar to that of Fig. 3(b) in 5 interstitial regions. Coupled fractal modes and higher-order  $IG_{mn}$  modes are also visible.

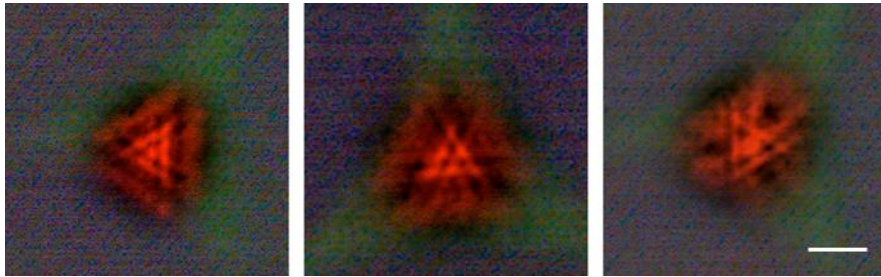

**Supplementary Figure 6:** An assortment of other fractal mode images (scale bar: 12  $\mu\text{m}$ ).

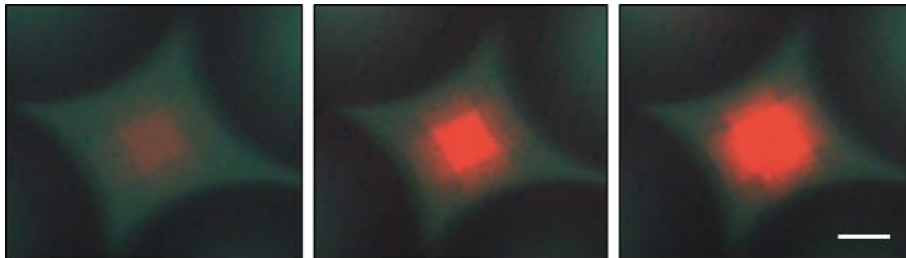

**Supplementary Figure 7:** Optical micrographs, acquired with a 10x objective, for interstitial regions formed by 4 microspheres (scale bar: 20  $\mu\text{m}$ ).

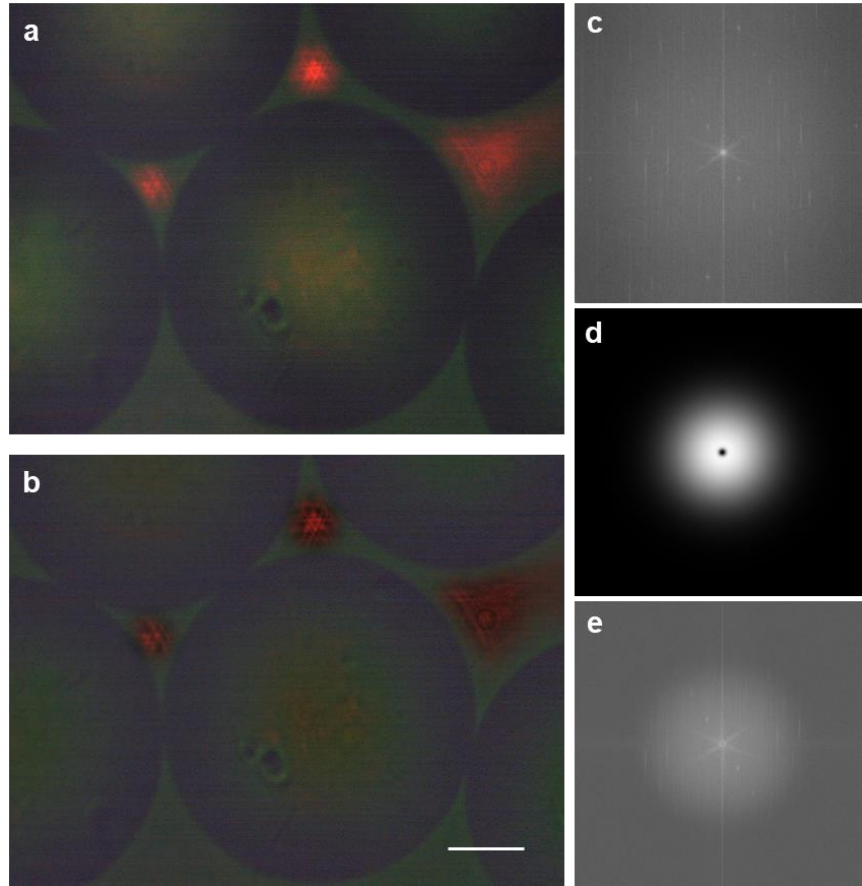

**Supplementary Figure 8: Images acquired with a 20x objective are processed by implementing a bandpass filter<sup>1</sup> in the frequency domain using ImageJ software. a,** Raw image captured by a CCD camera. **b,** Resulting image after implementing a bandpass filter in the Fourier domain. **c,** FFT of the raw image from panel **a.** **d,** Image of the bandpass filter. **e** Resulting FFT of the processed image.

#### Supplementary References

1. Gonzalez, R.C. & Woods, R.E. *Digital Image Processing* 2<sup>nd</sup> ed. (Prentice Hall, 2008).
