# Supplementary material for: Fractal modes and multi-beam generation from hybrid microlaser resonators
Source: PubMed Central journal article supplement (PMC6030083; doi:10.1038/s41467-018-04945-8), 2018-07-03
Supplement: 41467_2018_4945_MOESM3_ESM.pdf [file 41467_2018_4945_MOESM3_ESM.pdf]

## Description of Additional Supplementary Files

File Name: Supplementary Movie 1

Description: Supplementary Movie 1 shows a single *C. reinhardtii* cell being drawn to green pump radiation by its eyespot, and lasing occurs as long as the cell remains within the pump field.
